# Supplementary material for: Improving the accuracy of low level quantum chemical calculation for absorption energies: the genetic algorithm and neural network approach
Source: Royal Society of Chemistry journal article supplement (doi:10.1039/b812492b), 2009-01-01
Supplement: b812492b.pdf [file b812492b.pdf]

## Supplementary Information

## Improving the accuracy of low level quantum chemical calculation for absorption energies: the neural network and genetic algorithm approach

Ting Gao, Li-Li Shi, Hai-Bin Li, Shan-Shan Zhao, Hui Li, Shi-Ling Sun, Zhong-Min Su\* and Ying-Hua Lu\*

Table S1 The structure of the 160 organic molecules.

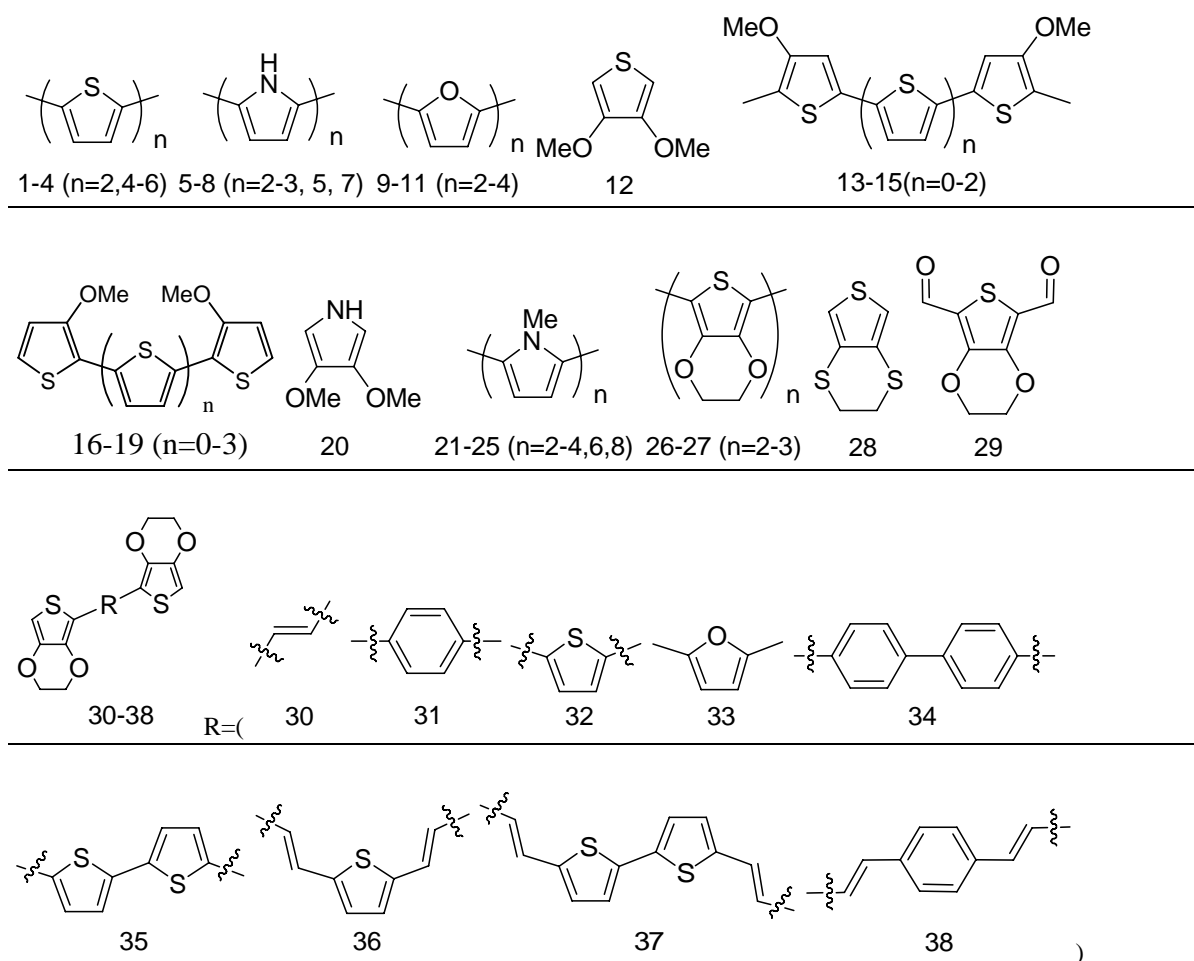

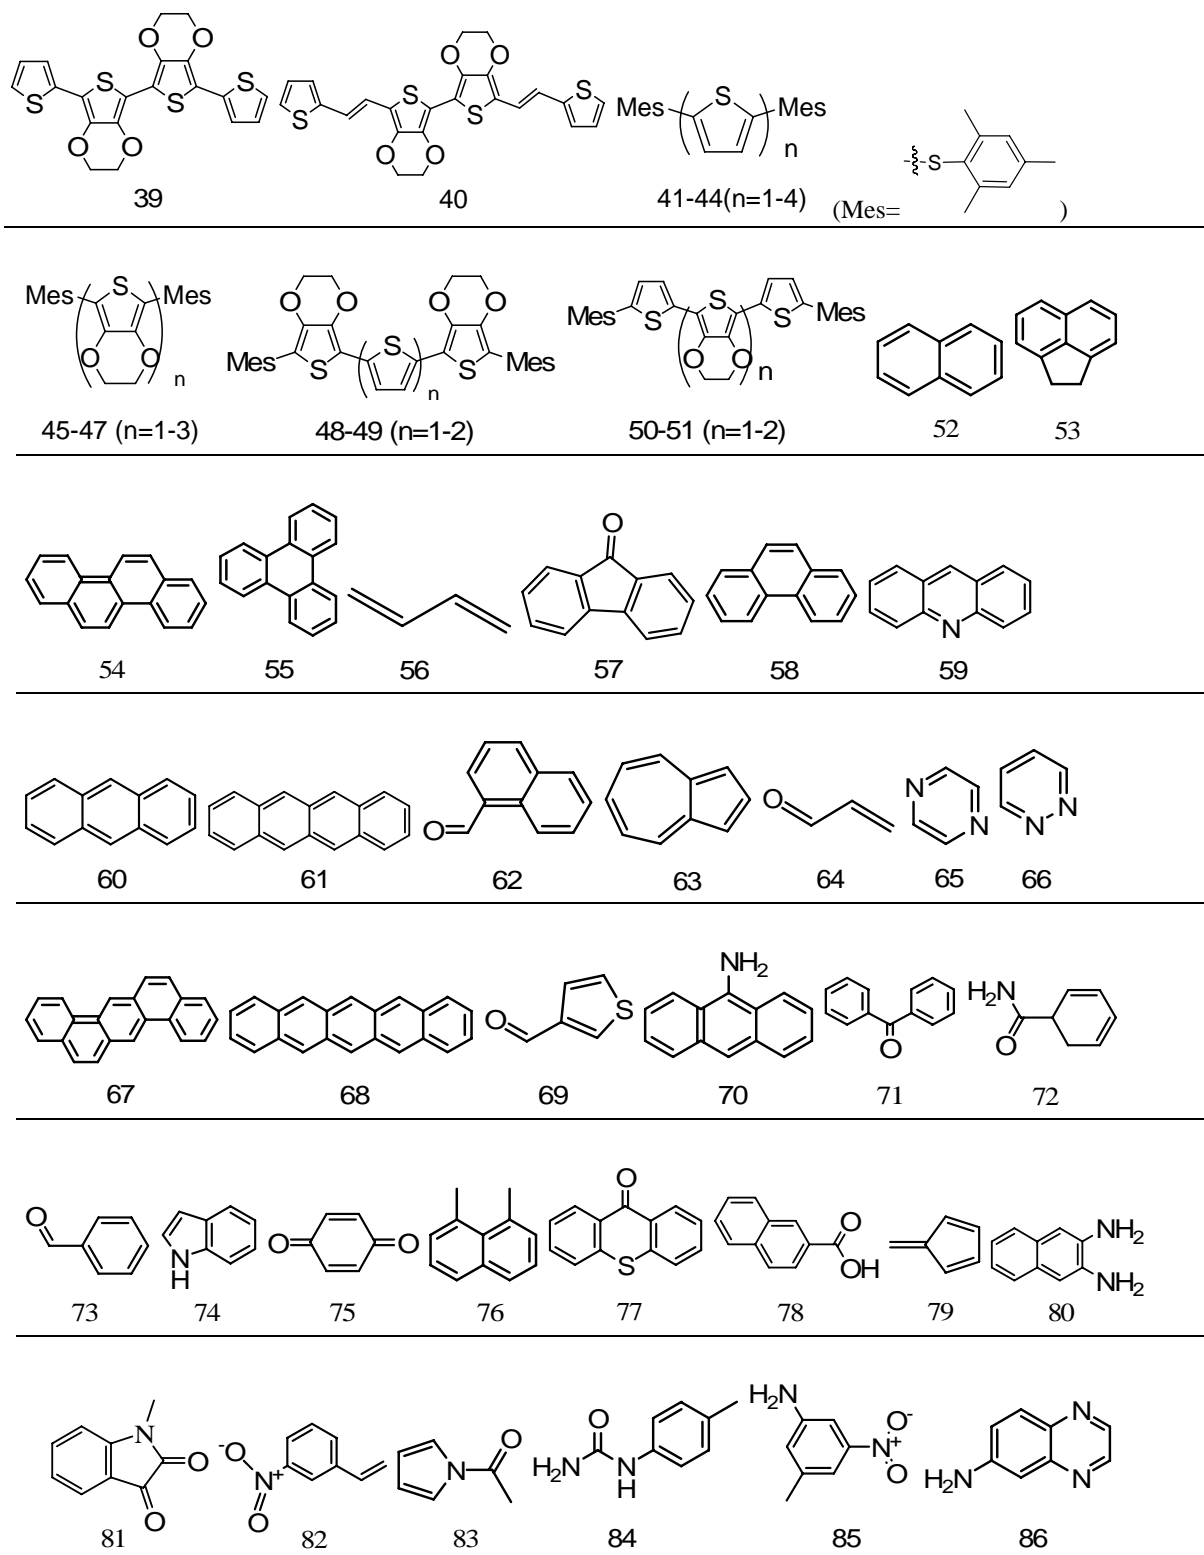

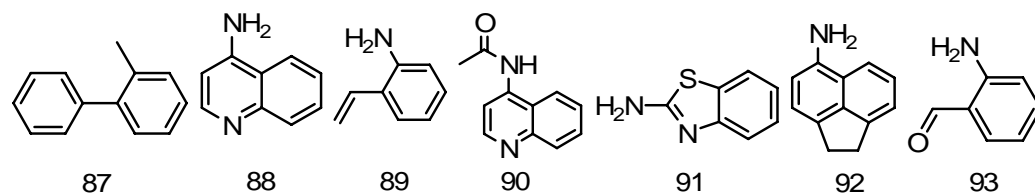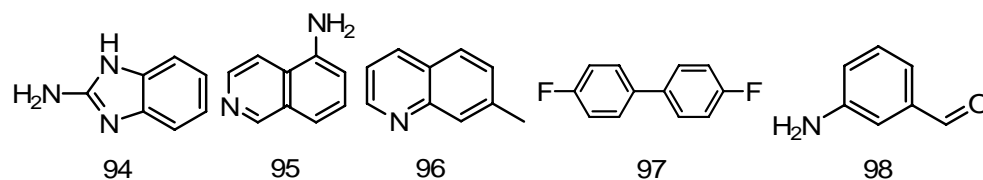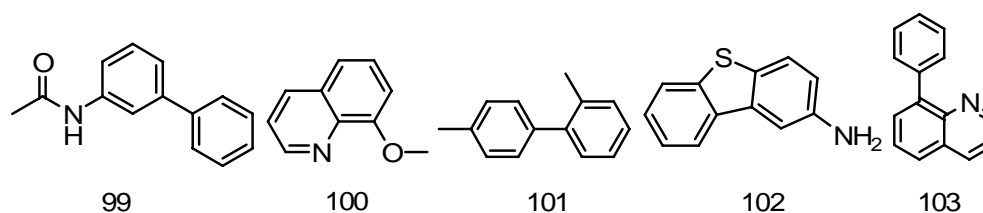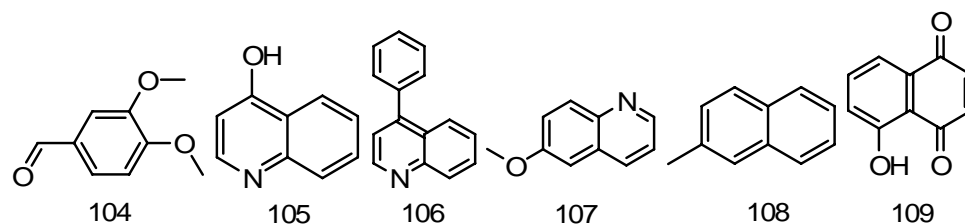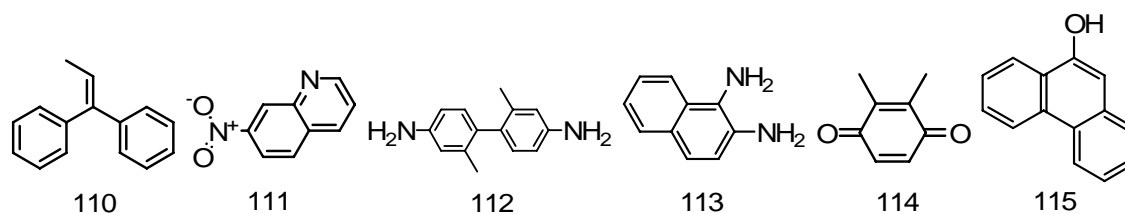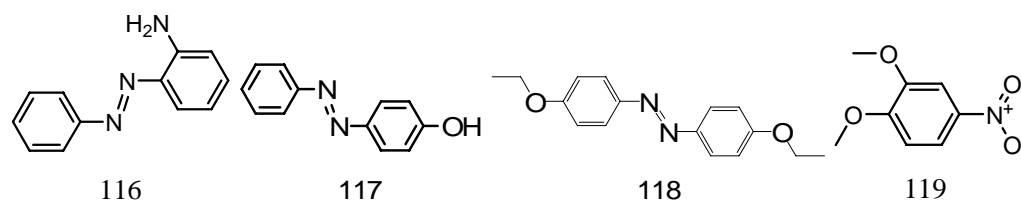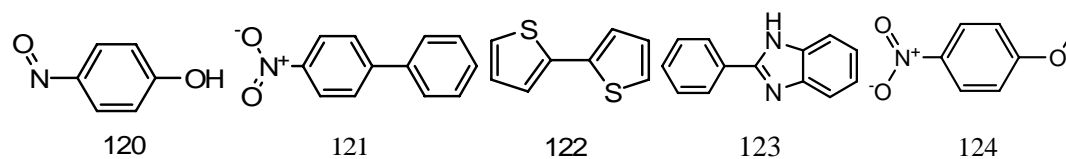

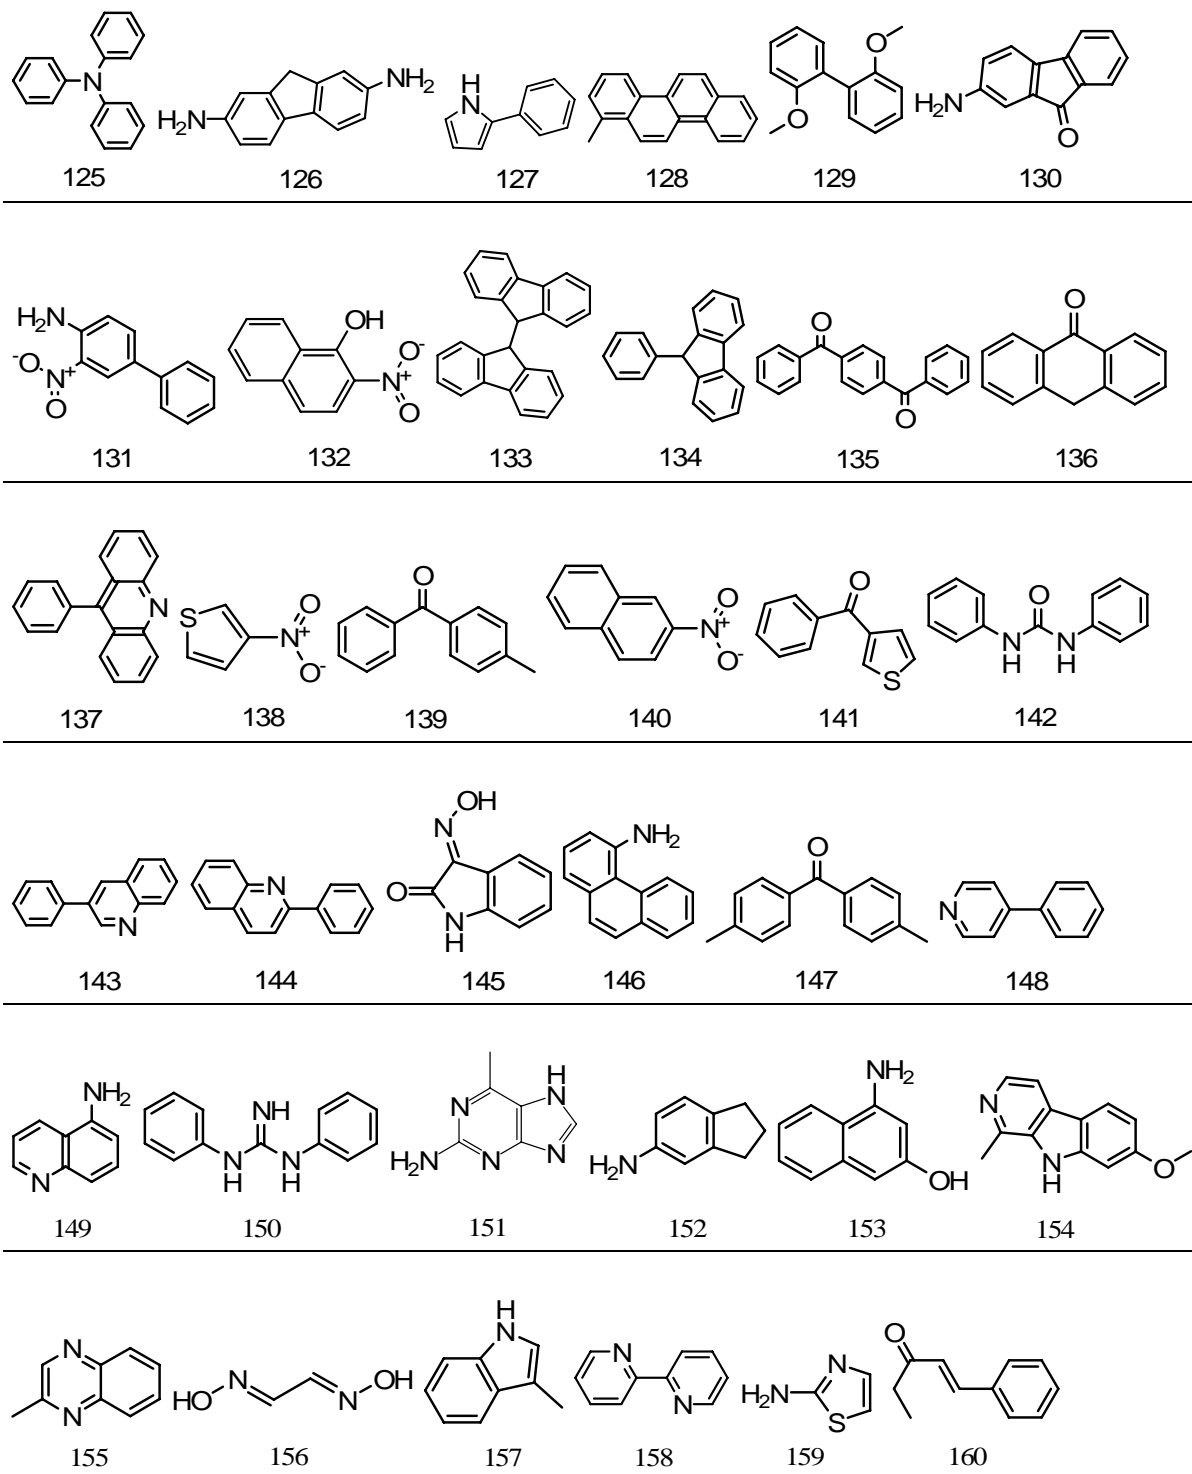

**Table S2** The experimental absorption energies and the calculated values of 160 molecules. All data are in units of eV.

| No.               | Expt. <sup>a</sup> | B3LYP/6-31G(d)   |                    | B3LYP/STO-3G     |                    |                    | ZINDO            |                    |                    |
|-------------------|--------------------|------------------|--------------------|------------------|--------------------|--------------------|------------------|--------------------|--------------------|
|                   |                    | Raw <sup>b</sup> | GABP1 <sup>c</sup> | Raw <sup>b</sup> | GABP1 <sup>c</sup> | GABP2 <sup>d</sup> | Raw <sup>b</sup> | GABP1 <sup>c</sup> | GABP2 <sup>d</sup> |
| 1 <sup>f</sup>    | 4.11               | 4.03             | 4.09               | 4.95             | 4.21               | 4.11               | 3.37             | 4.10               | 4.14               |
| 2                 | 3.18               | 2.84             | 3.10               | 3.51             | 3.15               | 3.12               | 2.5              | 3.17               | 3.17               |
| 3                 | 2.98               | 2.57             | 2.90               | 3.18             | 2.93               | 2.98               | 2.31             | 3.01               | 2.89               |
| 4                 | 2.87               | 2.38             | 2.91               | 2.96             | 2.84               | 2.89               | 2.19             | 2.93               | 2.82               |
| 5                 | 4.49               | 4.74             | 4.53               | 5.70             | 4.55               | 4.58               | 3.64             | 4.50               | 4.43               |
| 6 <sup>e</sup>    | 3.91               | 3.93             | 3.96               | 4.70             | 4.02               | 3.87               | 3.1              | 3.68               | 3.83               |
| 7                 | 3.38               | 3.21             | 3.37               | 3.83             | 3.34               | 3.39               | 2.66             | 3.33               | 3.34               |
| 8 <sup>e</sup>    | 3.25               | 2.90             | 3.40               | 3.46             | 3.09               | 3.39               | 2.48             | 3.22               | 3.37               |
| 9                 | 4.40               | 4.57             | 4.43               | 5.58             | 4.49               | 4.51               | 3.52             | 4.41               | 4.32               |
| 10 <sup>e</sup>   | 3.78               | 3.71             | 3.79               | 4.56             | 3.94               | 3.71               | 2.95             | 3.59               | 3.88               |
| 11                | 3.43               | 3.23             | 3.35               | 4.01             | 3.55               | 3.32               | 2.66             | 3.37               | 3.35               |
| 12 <sup>f</sup>   | 4.90               | 5.37             | 4.89               | 5.74             | 4.80               | 4.91               | 4.46             | 4.56               | 4.51               |
| 13 <sup>e</sup>   | 3.76               | 3.56             | 3.48               | 4.16             | 3.63               | 3.43               | 3.07             | 3.95               | 3.66               |
| 14 <sup>e</sup>   | 3.19               | 3.01             | 3.12               | 3.61             | 3.15               | 3.15               | 2.65             | 3.20               | 3.21               |
| 15 <sup>f</sup>   | 2.96               | 2.63             | 2.94               | 3.13             | 2.93               | 3.08               | 2.41             | 2.99               | 2.85               |
| 16 <sup>f</sup>   | 3.81               | 3.78             | 3.80               | 4.25             | 3.76               | 3.72               | 3.09             | 4.00               | 3.76               |
| 17                | 3.23               | 3.12             | 3.22               | 3.63             | 3.18               | 3.23               | 2.64             | 3.25               | 3.26               |
| 18                | 2.99               | 2.75             | 3.11               | 3.25             | 2.99               | 3.09               | 2.4              | 3.04               | 2.92               |
| 19                | 2.83               | 2.51             | 2.80               | 2.99             | 2.83               | 2.80               | 2.24             | 2.89               | 2.75               |
| 20                | 5.58               | 6.04             | 5.87               | 8.27             | 5.62               | 6.05               | 5.9              | 5.61               | 5.89               |
| 21 <sup>f</sup>   | 4.96               | 4.97             | 4.68               | 5.89             | 4.87               | 4.91               | 3.89             | 4.69               | 4.25               |
| 22                | 4.58               | 4.66             | 4.56               | 5.49             | 4.64               | 4.60               | 3.71             | 4.55               | 4.56               |
| 23 <sup>e</sup>   | 4.44               | 4.21             | 4.37               | 4.94             | 4.34               | 4.20               | 3.49             | 4.38               | 4.26               |
| 24 <sup>f</sup>   | 4.34               | 3.92             | 4.29               | 4.66             | 4.22               | 3.94               | 3.34             | 4.29               | 4.06               |
| 25                | 4.32               | 3.82             | 4.39               | 4.52             | 4.32               | 4.39               | 3.26             | 4.26               | 4.33               |
| 26                | 3.87               | 3.90             | 3.83               | 4.42             | 3.95               | 3.89               | 3.18             | 3.90               | 3.79               |
| 27                | 3.10               | 3.15             | 3.14               | 3.54             | 3.20               | 3.03               | 2.63             | 3.15               | 3.14               |
| 28                | 4.38               | 4.69             | 4.46               | 5.21             | 4.52               | 4.57               | 4.42             | 4.53               | 4.51               |
| 29 <sup>e,f</sup> | 3.83               | 4.11             | 3.84               | 4.69             | 3.96               | 4.01               | 3.54             | 4.08               | 3.82               |
| 30                | 3.45               | 3.44             | 3.54               | 3.91             | 3.43               | 3.49               | 2.97             | 3.42               | 3.45               |
| 31 <sup>f</sup>   | 3.60               | 3.55             | 3.65               | 4.03             | 3.51               | 3.25               | 3.25             | 3.62               | 3.83               |
| 32 <sup>e</sup>   | 3.32               | 3.18             | 3.25               | 3.69             | 3.24               | 3.22               | 2.69             | 3.24               | 3.23               |
| 33                | 3.43               | 3.29             | 3.41               | 3.87             | 3.40               | 3.24               | 2.76             | 3.33               | 3.37               |
| 34                | 3.63               | 3.45             | 3.59               | 3.88             | 3.45               | 3.44               | 3.33             | 3.58               | 3.53               |
| 35                | 3.01               | 2.80             | 3.04               | 3.30             | 3.03               | 3.14               | 2.44             | 3.02               | 3.04               |
| 36                | 2.89               | 2.68             | 2.81               | 3.12             | 2.88               | 2.68               | 2.48             | 2.92               | 2.88               |
| 37 <sup>f</sup>   | 2.73               | 2.45             | 2.71               | 2.89             | 2.80               | 2.93               | 2.29             | 2.69               | 2.76               |
| 38                | 3.15               | 2.90             | 3.15               | 3.34             | 2.98               | 3.12               | 2.9              | 3.15               | 3.25               |
| 39 <sup>e</sup>   | 2.98               | 2.78             | 3.00               | 3.22             | 2.99               | 3.13               | 2.41             | 3.01               | 2.86               |
| 40                | 2.69               | 2.45             | 2.72               | 2.81             | 2.78               | 2.71               | 2.24             | 2.68               | 2.76               |

| No.               | Expt. <sup>a</sup> | B3LYP/6-31G(d)   |                    | B3LYP/STO-3G     |                    |                    | ZINDO            |                    |                    |
|-------------------|--------------------|------------------|--------------------|------------------|--------------------|--------------------|------------------|--------------------|--------------------|
|                   |                    | Raw <sup>b</sup> | GABP1 <sup>c</sup> | Raw <sup>b</sup> | GABP1 <sup>c</sup> | GABP2 <sup>d</sup> | Raw <sup>b</sup> | GABP1 <sup>c</sup> | GABP2 <sup>d</sup> |
| 41 <sup>e,f</sup> | 4.11               | 4.13             | 4.13               | 4.51             | 4.11               | 4.32               | 4.05             | 4.35               | 4.36               |
| 42                | 3.46               | 3.34             | 3.63               | 3.95             | 3.56               | 3.68               | 3.15             | 3.58               | 3.57               |
| 43                | 3.21               | 2.88             | 3.21               | 3.47             | 3.17               | 3.32               | 2.69             | 3.21               | 3.33               |
| 44                | 2.95               | 2.62             | 2.97               | 3.17             | 3.01               | 3.11               | 2.45             | 3.07               | 3.13               |
| 45                | 4.07               | 4.12             | 4.09               | 4.49             | 4.11               | 4.10               | 3.93             | 4.21               | 4.20               |
| 46                | 3.43               | 3.34             | 3.34               | 3.84             | 3.50               | 3.46               | 2.97             | 3.39               | 3.28               |
| 47                | 3.09               | 2.85             | 3.05               | 3.25             | 3.06               | 3.06               | 2.51             | 2.95               | 3.05               |
| 48                | 3.09               | 2.88             | 3.17               | 3.36             | 3.03               | 3.13               | 2.57             | 3.03               | 3.15               |
| 49 <sup>e,f</sup> | 2.71               | 2.60             | 2.80               | 3.09             | 3.04               | 2.87               | 2.37             | 2.86               | 2.58               |
| 50 <sup>e</sup>   | 3.05               | 2.84             | 3.07               | 3.36             | 3.13               | 2.97               | 2.6              | 3.11               | 3.05               |
| 51                | 2.88               | 2.54             | 2.85               | 2.97             | 2.98               | 2.85               | 2.32             | 2.89               | 2.86               |
| 52                | 5.63               | 6.27             | 5.86               | 7.18             | 5.48               | 5.86               | 5.27             | 5.67               | 5.41               |
| 53                | 5.47               | 6.06             | 5.59               | 7.16             | 5.67               | 5.52               | 5.3              | 5.44               | 5.53               |
| 54                | 4.66               | 4.71             | 4.49               | 5.54             | 4.48               | 4.43               | 4.48             | 4.53               | 4.59               |
| 55                | 4.83               | 4.81             | 4.78               | 5.65             | 4.57               | 4.63               | 4.58             | 4.84               | 4.83               |
| 56                | 5.91               | 6.04             | 5.63               | 7.38             | 5.83               | 5.67               | 5.37             | 5.78               | 5.46               |
| 57                | 4.85               | 4.54             | 4.73               | 5.31             | 4.65               | 4.73               | 4.9              | 5.01               | 4.69               |
| 58 <sup>e</sup>   | 4.96               | 5.11             | 4.79               | 5.78             | 4.69               | 4.84               | 4.73             | 5.19               | 4.84               |
| 59 <sup>e</sup>   | 4.96               | 5.37             | 4.64               | 6.20             | 4.88               | 4.76               | 4.73             | 4.77               | 4.75               |
| 60                | 4.96               | 5.31             | 4.64               | 6.19             | 4.67               | 4.65               | 4.68             | 5.01               | 4.60               |
| 61                | 4.54               | 4.75             | 4.38               | 5.52             | 4.29               | 4.38               | 4.28             | 4.30               | 4.38               |
| 62                | 5.88               | 6.15             | 5.83               | 7.08             | 5.78               | 5.66               | 5.5              | 5.53               | 5.76               |
| 63                | 4.53               | 5.17             | 4.75               | 6.05             | 4.99               | 4.87               | 4.48             | 4.54               | 4.74               |
| 64                | 5.99               | 6.43             | 5.85               | 7.67             | 5.87               | 5.87               | 5.89             | 6.14               | 5.81               |
| 65                | 4.75               | 5.52             | 5.17               | 6.52             | 5.17               | 5.35               | 4.38             | 4.74               | 5.01               |
| 66 <sup>f</sup>   | 5.02               | 5.75             | 5.32               | 6.18             | 5.16               | 5.29               | 4.91             | 5.10               | 5.03               |
| 67                | 4.13               | 4.40             | 4.17               | 5.28             | 4.33               | 4.15               | 4.15             | 4.28               | 4.50               |
| 68                | 4.00               | 4.34             | 4.24               | 5.03             | 4.06               | 4.24               | 3.98             | 3.94               | 4.22               |
| 69                | 4.94               | 5.41             | 4.98               | 6.31             | 5.23               | 5.31               | 5.47             | 5.33               | 5.31               |
| 70                | 4.28               | 5.29             | 4.57               | 6.19             | 4.77               | 4.60               | 4.66             | 4.73               | 4.70               |
| 71                | 4.92               | 4.75             | 4.85               | 5.74             | 4.95               | 4.98               | 4.77             | 4.96               | 4.81               |
| 72 <sup>f</sup>   | 4.96               | 5.36             | 5.05               | 6.52             | 4.97               | 5.52               | 4.96             | 4.83               | 5.14               |
| 73 <sup>f</sup>   | 5.15               | 5.31             | 5.09               | 6.49             | 5.34               | 5.38               | 4.88             | 5.12               | 5.14               |
| 74                | 5.79               | 5.93             | 5.54               | 7.09             | 5.70               | 5.65               | 5.61             | 6.01               | 5.90               |
| 75 <sup>f</sup>   | 5.10               | 4.98             | 5.06               | 5.73             | 4.87               | 4.91               | 4.92             | 5.06               | 5.10               |
| 76                | 5.44               | 5.88             | 5.45               | 6.98             | 5.50               | 5.40               | 5.18             | 5.57               | 5.46               |
| 77 <sup>e,f</sup> | 4.86               | 5.01             | 4.91               | 5.88             | 4.95               | 5.01               | 5.26             | 5.64               | 5.23               |
| 78                | 5.39               | 5.44             | 5.17               | 6.47             | 5.28               | 5.25               | 4.92             | 5.24               | 5.23               |
| 79                | 5.08               | 5.45             | 5.33               | 6.41             | 5.27               | 5.31               | 4.93             | 5.10               | 5.20               |
| 80                | 5.10               | 5.53             | 5.13               | 6.11             | 5.06               | 5.05               | 4.91             | 5.11               | 5.17               |
| 81                | 5.12               | 5.54             | 5.30               | 6.40             | 5.11               | 5.46               | 5.89             | 5.29               | 5.52               |
| 82 <sup>e</sup>   | 5.17               | 5.29             | 5.15               | 5.30             | 4.63               | 4.81               | 4.72             | 5.18               | 4.99               |
| 83                | 5.19               | 5.49             | 5.04               | 6.28             | 5.17               | 5.25               | 5.1              | 5.05               | 5.12               |
| 84 <sup>f</sup>   | 5.17               | 5.34             | 4.99               | 6.07             | 5.08               | 5.19               | 4.62             | 4.95               | 4.98               |
| 85 <sup>e</sup>   | 5.28               | 5.90             | 5.47               | 5.96             | 4.92               | 5.29               | 4.97             | 5.24               | 5.25               |

| No.                | Expt. <sup>a</sup> | B3LYP/6-31G(d)   |                    | B3LYP/STO-3G     |                    |                    | ZINDO            |                    |                    |
|--------------------|--------------------|------------------|--------------------|------------------|--------------------|--------------------|------------------|--------------------|--------------------|
|                    |                    | Raw <sup>b</sup> | GABP1 <sup>c</sup> | Raw <sup>b</sup> | GABP1 <sup>c</sup> | GABP2 <sup>d</sup> | Raw <sup>b</sup> | GABP1 <sup>c</sup> | GABP2 <sup>d</sup> |
| 86 <sup>e</sup>    | 5.25               | 5.35             | 5.06               | 6.16             | 5.12               | 5.12               | 4.76             | 5.35               | 5.00               |
| 87                 | 5.23               | 5.18             | 5.12               | 6.20             | 5.09               | 5.15               | 4.72             | 5.32               | 5.23               |
| 88                 | 5.32               | 5.66             | 5.31               | 6.32             | 5.29               | 5.34               | 5.14             | 5.59               | 5.51               |
| 89                 | 5.39               | 6.10             | 5.70               | 7.06             | 5.69               | 5.67               | 5.33             | 5.21               | 5.53               |
| 90 <sup>e</sup>    | 5.46               | 5.64             | 5.43               | 6.03             | 5.08               | 5.15               | 5.46             | 5.47               | 5.67               |
| 91                 | 5.69               | 6.05             | 5.58               | 6.80             | 5.52               | 5.53               | 5.84             | 5.82               | 5.64               |
| 92 <sup>f</sup>    | 5.74               | 6.12             | 5.65               | 7.17             | 5.79               | 5.64               | 5.43             | 5.88               | 5.79               |
| 93 <sup>e</sup>    | 5.99               | 6.61             | 6.06               | 6.75             | 5.44               | 5.58               | 6.13             | 5.77               | 6.06               |
| 94 <sup>f</sup>    | 5.99               | 6.60             | 6.19               | 7.38             | 5.99               | 5.98               | 5.52             | 5.93               | 5.80               |
| 95 <sup>e</sup>    | 6.05               | 6.30             | 5.84               | 7.33             | 5.86               | 5.76               | 5.41             | 5.88               | 5.78               |
| 96                 | 6.05               | 5.89             | 5.49               | 6.98             | 5.58               | 5.45               | 5.12             | 5.58               | 5.52               |
| 97                 | 5.06               | 5.01             | 4.93               | 5.61             | 4.68               | 4.65               | 4.48             | 5.08               | 5.01               |
| 98 <sup>e</sup>    | 5.06               | 5.75             | 5.37               | 6.70             | 5.38               | 5.53               | 5.39             | 5.05               | 5.36               |
| 99                 | 5.12               | 5.28             | 5.17               | 6.10             | 5.15               | 5.03               | 4.9              | 5.01               | 4.93               |
| 100                | 5.17               | 5.58             | 5.22               | 6.24             | 5.15               | 5.21               | 4.97             | 5.24               | 5.22               |
| 101                | 5.19               | 5.10             | 5.02               | 6.10             | 5.07               | 5.09               | 4.64             | 5.02               | 5.18               |
| 102                | 5.21               | 5.21             | 5.07               | 5.99             | 5.04               | 5.14               | 5.29             | 5.25               | 5.01               |
| 103                | 5.32               | 5.13             | 5.17               | 6.11             | 5.14               | 5.18               | 4.97             | 5.12               | 5.01               |
| 104 <sup>e,f</sup> | 5.41               | 5.79             | 5.33               | 6.37             | 5.09               | 5.45               | 5.43             | 5.28               | 5.56               |
| 105                | 5.51               | 5.95             | 5.51               | 6.47             | 5.35               | 5.37               | 5.17             | 5.28               | 5.52               |
| 106 <sup>e,f</sup> | 5.46               | 5.58             | 5.53               | 6.24             | 5.28               | 5.32               | 5.46             | 5.53               | 5.31               |
| 107                | 5.56               | 6.00             | 5.55               | 6.37             | 5.22               | 5.18               | 5                | 5.46               | 5.41               |
| 108                | 5.56               | 6.11             | 5.52               | 7.06             | 5.46               | 5.51               | 5.19             | 5.54               | 5.39               |
| 109                | 5.00               | 4.84             | 5.02               | 5.49             | 4.78               | 4.84               | 4.74             | 4.89               | 4.92               |
| 110                | 5.00               | 4.77             | 4.92               | 5.78             | 4.94               | 4.99               | 4.57             | 4.78               | 4.83               |
| 111                | 5.00               | 4.98             | 4.86               | 5.04             | 5.00               | 4.61               | 4.55             | 4.85               | 4.75               |
| 112 <sup>f</sup>   | 5.00               | 5.53             | 5.26               | 6.49             | 5.37               | 5.29               | 5.65             | 5.31               | 5.42               |
| 113                | 5.00               | 5.30             | 5.00               | 5.87             | 4.87               | 4.88               | 4.93             | 5.10               | 5.05               |
| 114                | 5.00               | 4.85             | 4.95               | 5.64             | 4.86               | 4.94               | 4.8              | 5.01               | 4.95               |
| 115 <sup>e</sup>   | 5.00               | 5.01             | 4.91               | 6.14             | 5.03               | 5.11               | 4.69             | 4.80               | 4.91               |
| 116                | 3.96               | 3.80             | 3.89               | 4.79             | 4.16               | 4.19               | 3.14             | 3.59               | 3.85               |
| 117 <sup>e,f</sup> | 3.57               | 3.59             | 3.64               | 4.27             | 3.62               | 3.71               | 3.32             | 3.76               | 3.86               |
| 118 <sup>f</sup>   | 3.43               | 3.41             | 3.48               | 4.00             | 3.44               | 3.46               | 3.18             | 3.51               | 3.68               |
| 119                | 3.84               | 4.01             | 3.78               | 4.66             | 3.94               | 4.05               | 3.6              | 4.11               | 3.92               |
| 120                | 4.16               | 4.21             | 4.22               | 4.99             | 4.31               | 4.25               | 3.76             | 4.20               | 4.26               |
| 121                | 4.07               | 3.91             | 4.09               | 4.69             | 4.10               | 4.08               | 3.63             | 4.13               | 4.08               |
| 122                | 4.12               | 4.12             | 4.14               | 5.03             | 4.27               | 4.18               | 3.44             | 3.95               | 4.18               |
| 123                | 4.11               | 4.24             | 4.20               | 5.09             | 4.39               | 4.36               | 3.77             | 4.25               | 4.32               |
| 124 <sup>e</sup>   | 4.07               | 4.30             | 4.18               | 5.25             | 4.52               | 4.38               | 3.74             | 4.24               | 4.10               |
| 125                | 4.18               | 4.12             | 4.26               | 4.79             | 4.21               | 4.19               | 4.13             | 4.53               | 4.47               |
| 126                | 4.22               | 4.30             | 4.31               | 4.92             | 4.29               | 4.31               | 3.89             | 4.20               | 4.46               |
| 127 <sup>e</sup>   | 4.28               | 4.52             | 4.48               | 5.38             | 4.53               | 4.53               | 3.94             | 4.33               | 4.49               |
| 128                | 4.43               | 4.85             | 4.63               | 5.81             | 4.70               | 4.71               | 4.48             | 4.54               | 4.58               |
| 129                | 4.46               | 4.60             | 4.58               | 4.97             | 4.39               | 4.43               | 4.3              | 4.69               | 4.66               |
| 130                | 4.63               | 4.75             | 4.63               | 5.52             | 4.78               | 4.75               | 4.72             | 4.85               | 4.69               |

| No.              | Expt. <sup>a</sup> | B3LYP/6-31G(d)   |                    | B3LYP/STO-3G     |                    |                    | ZINDO            |                    |                    |
|------------------|--------------------|------------------|--------------------|------------------|--------------------|--------------------|------------------|--------------------|--------------------|
|                  |                    | Raw <sup>b</sup> | GABP1 <sup>c</sup> | Raw <sup>b</sup> | GABP1 <sup>c</sup> | GABP2 <sup>d</sup> | Raw <sup>b</sup> | GABP1 <sup>c</sup> | GABP2 <sup>d</sup> |
| 131              | 4.66               | 4.84             | 4.87               | 5.27             | 4.62               | 4.66               | 4.27             | 4.62               | 4.71               |
| 132              | 4.66               | 4.68             | 4.63               | 5.41             | 4.71               | 4.78               | 4.31             | 4.66               | 4.84               |
| 133              | 4.66               | 4.53             | 4.65               | 5.47             | 4.82               | 4.78               | 4.14             | 4.49               | 4.61               |
| 134              | 4.68               | 4.58             | 4.76               | 5.50             | 4.75               | 4.78               | 4.14             | 4.53               | 4.47               |
| 135 <sup>f</sup> | 4.71               | 4.35             | 4.60               | 5.34             | 4.77               | 4.80               | 4.56             | 4.76               | 4.80               |
| 136 <sup>f</sup> | 4.71               | 4.66             | 4.78               | 5.26             | 4.64               | 4.74               | 4.62             | 4.85               | 4.78               |
| 137              | 4.77               | 5.25             | 4.89               | 5.44             | 4.77               | 4.81               | 4.66             | 4.65               | 4.69               |
| 138              | 4.77               | 4.91             | 4.59               | 5.11             | 4.45               | 4.55               | 4.76             | 4.78               | 4.86               |
| 139 <sup>e</sup> | 4.77               | 4.61             | 4.73               | 5.57             | 4.86               | 4.93               | 4.64             | 4.84               | 4.79               |
| 140              | 4.81               | 4.89             | 4.80               | 5.20             | 4.56               | 4.69               | 4.41             | 4.76               | 4.86               |
| 141 <sup>f</sup> | 4.82               | 4.78             | 4.74               | 5.45             | 4.75               | 4.82               | 4.83             | 5.07               | 4.98               |
| 142              | 4.84               | 4.91             | 4.78               | 5.62             | 4.86               | 4.81               | 4.72             | 4.84               | 4.80               |
| 143 <sup>f</sup> | 4.90               | 4.93             | 4.86               | 5.79             | 4.90               | 4.90               | 4.66             | 4.81               | 4.78               |
| 144              | 4.92               | 4.88             | 4.67               | 5.74             | 4.81               | 4.80               | 4.57             | 4.76               | 4.72               |
| 145              | 4.92               | 5.26             | 4.99               | 5.75             | 4.84               | 4.90               | 4.93             | 5.11               | 4.99               |
| 146              | 4.96               | 5.24             | 5.12               | 6.10             | 5.05               | 5.11               | 4.68             | 4.94               | 5.12               |
| 147 <sup>f</sup> | 4.70               | 4.56             | 4.66               | 5.53             | 4.83               | 4.86               | 4.59             | 4.77               | 4.72               |
| 148              | 4.84               | 5.03             | 4.96               | 6.01             | 5.05               | 5.06               | 4.67             | 4.90               | 4.93               |
| 149 <sup>e</sup> | 4.92               | 5.39             | 5.09               | 6.16             | 5.17               | 5.22               | 4.93             | 5.42               | 5.39               |
| 150              | 5.12               | 4.82             | 4.89               | 5.40             | 4.75               | 4.83               | 4.72             | 5.14               | 4.81               |
| 151              | 6.66               | 6.39             | 6.46               | 6.82             | 6.66               | 6.45               | 5.55             | 5.96               | 5.85               |
| 152              | 6.08               | 6.74             | 5.98               | 8.06             | 6.01               | 5.99               | 5.83             | 5.62               | 5.82               |
| 153              | 5.12               | 5.52             | 5.17               | 5.90             | 5.01               | 5.06               | 5.05             | 5.18               | 5.01               |
| 154              | 5.17               | 5.25             | 5.19               | 5.90             | 5.17               | 5.23               | 4.86             | 5.34               | 5.36               |
| 155              | 5.30               | 5.80             | 5.44               | 6.85             | 5.38               | 5.38               | 4.95             | 5.51               | 5.50               |
| 156              | 5.32               | 5.42             | 5.08               | 5.83             | 4.80               | 4.82               | 5.13             | 5.45               | 5.27               |
| 157              | 5.56               | 6.13             | 5.65               | 7.20             | 5.77               | 5.66               | 5.35             | 5.82               | 5.76               |
| 158              | 4.40               | 4.68             | 4.61               | 5.69             | 4.69               | 4.74               | 4.11             | 4.44               | 4.48               |
| 159 <sup>f</sup> | 4.84               | 5.37             | 4.90               | 6.32             | 5.18               | 5.29               | 4.36             | 4.79               | 4.88               |
| 160              | 4.30               | 4.42             | 4.42               | 5.40             | 4.66               | 4.63               | 4.21             | 4.33               | 4.58               |

<sup>a</sup> Experimental data.

<sup>b</sup> Raw calculated values.

<sup>c</sup> Corrected calculated values after GABP1 correction.

<sup>d</sup> Corrected calculated values after GABP2 correction.

<sup>e</sup> Molecules belong to the testing set in GABP1 correction.

<sup>f</sup> Molecules belong to the testing set in GABP2 correction.



**Table S3** Synaptic weights  $W_{x_{ij}}$  and  $W_{y_j}$ , biases  $B_{y_j}$  and  $B_z$  for B3LYP/6-31G(d)-GABP1 method.

| Weights and biases | $y_1$    | $y_2$    | $y_3$   | $y_4$    |
|--------------------|----------|----------|---------|----------|
| $W_{x_{1j}}$       | -1.0886  | -0.73381 | 1.9044  | 1.3932   |
| $W_{x_{2j}}$       | 0.6826   | -2.4694  | 6.8653  | -1.3227  |
| $W_{x_{3j}}$       | -0.06601 | 1.3449   | -3.9795 | 0.67966  |
| $W_{x_{4j}}$       | 0.066904 | -0.44596 | 0.55725 | -0.18936 |
| $W_{x_{5j}}$       | -1.2813  | 4.1712   | -7.0996 | 1.3305   |
| $W_{x_{6j}}$       | 0.79617  | -3.8915  | 2.7795  | -0.31063 |
| $B_{y_j}$          | 0.83416  | 4.0869   | 1.0647  | 1.8916   |
|                    | $Z$      |          |         |          |
| $W_{y_1}$          | -0.72976 |          |         |          |
| $W_{y_2}$          | -99.043  |          |         |          |
| $W_{y_3}$          | 0.16884  |          |         |          |
| $W_{y_4}$          | 1.0141   |          |         |          |
| $B_z$              | 98.259   |          |         |          |

**Table S4** Synaptic weights  $W_{x_{ij}}$  and  $W_{y_j}$ , biases  $B_{y_j}$  and  $B_z$  for B3LYP/STO-3G-GABP1 method.

| Weights and biases | $y_1$    | $y_2$    | $y_3$   | $y_4$    |
|--------------------|----------|----------|---------|----------|
| $W_{x_{1j}}$       | 1.1198   | -1.3019  | 6.1706  | 2.5362   |
| $W_{x_{2j}}$       | 0.91431  | -1.1807  | -16.314 | -0.29015 |
| $W_{x_{3j}}$       | -0.20214 | 0.25006  | -10.335 | -0.03535 |
| $W_{x_{4j}}$       | 0.22171  | -0.28614 | 17.469  | -0.24977 |
| $W_{x_{5j}}$       | 0.27307  | -0.3336  | 2.568   | -0.41078 |
| $W_{x_{6j}}$       | -0.87915 | 1.133    | 30.991  | 0.85667  |
| $B_{y_j}$          | -2.3278  | 2.0905   | -16.146 | 1.2034   |
|                    | $Z$      |          |         |          |
| $W_{y_1}$          | 110.39   |          |         |          |
| $W_{y_2}$          | 51.747   |          |         |          |
| $W_{y_3}$          | 2.996    |          |         |          |
| $W_{y_4}$          | 0.37297  |          |         |          |
| $B_z$              | 60.885   |          |         |          |

**Table S5** Synaptic weights  $Wx_{ij}$  and  $Wy_j$ , biases  $By_j$  and  $Bz$  for ZINDO-GABP1 method.

| Weights and biases | y1       | y2       | y3       | y4      |
|--------------------|----------|----------|----------|---------|
| $Wx_{1j}$          | 24.608   | -0.06339 | 0.34534  | 27.25   |
| $Wx_{2j}$          | 33.697   | -0.22305 | -0.07797 | 84.793  |
| $Wx_{3j}$          | -4.6181  | -1.2994  | -0.14482 | 19.343  |
| $Wx_{4j}$          | -61.71   | -0.4833  | -0.01236 | -38.349 |
| $Wx_{5j}$          | -62.451  | -0.11055 | -0.03262 | -51.599 |
| $Wx_{6j}$          | 36.825   | 2.297    | 0.20474  | -113.09 |
| $By_j$             | -56.827  | 2.7869   | -0.02731 | -75.378 |
|                    | $Z$      |          |          |         |
| $Wy_1$             | 0.097383 |          |          |         |
| $Wy_2$             | -14.415  |          |          |         |
| $Wy_3$             | 2.1235   |          |          |         |
| $Wy_4$             | -0.1585  |          |          |         |
| $Bz$               | 14.047   |          |          |         |

**Table S6** Synaptic weights  $W_{x_{ij}}$  and  $W_{y_j}$ , biases  $B_{y_j}$  and  $B_z$  for B3LYP/STO-3G-GABP2 method.

| Weights and biases | $y_1$    | $y_2$    | $y_3$   | $y_4$   |
|--------------------|----------|----------|---------|---------|
| $W_{x_{1j}}$       | -19.713  | -1.1286  | 0.35008 | 66.366  |
| $W_{x_{2j}}$       | -15.287  | -0.30304 | 3.0247  | -84.483 |
| $W_{x_{3j}}$       | -9.7705  | 0.31049  | -5.6704 | 11.984  |
| $W_{x_{4j}}$       | 7.2324   | -0.06519 | -4.189  | -38.561 |
| $W_{x_{5j}}$       | 2.5447   | -0.07894 | 29.334  | -2.0401 |
| $W_{x_{6j}}$       | -2.1598  | 0.24323  | -32.259 | 103.08  |
| $B_{y_j}$          | 5.3127   | -0.07127 | 6.7887  | 47.813  |
|                    | $Z$      |          |         |         |
| $W_{y_1}$          | -0.23817 |          |         |         |
| $W_{y_2}$          | -0.99353 |          |         |         |
| $W_{y_3}$          | -15.494  |          |         |         |
| $W_{y_4}$          | 0.10284  |          |         |         |
| $B_z$              | 15.542   |          |         |         |

**Table S7** Synaptic weights  $W_{x_{ij}}$  and  $W_{y_j}$ , biases  $B_{y_j}$  and  $B_z$  for ZINDO-GABP2 method.

| Weights and biases | $y_1$    | $y_2$   | $y_3$    | $y_4$   |
|--------------------|----------|---------|----------|---------|
| $W_{x_{1j}}$       | -2.4399  | -195.09 | -0.52175 | -55.071 |
| $W_{x_{2j}}$       | -0.27083 | -216.26 | 0.093908 | -27.23  |
| $W_{x_{3j}}$       | -0.31447 | -20.598 | 0.12894  | 43.938  |
| $W_{x_{4j}}$       | 4.0234   | 221.53  | 0.092644 | 26.21   |
| $W_{x_{5j}}$       | -7.3457  | -14.18  | -0.0784  | 25.958  |
| $W_{x_{6j}}$       | 0.99731  | -84.207 | -0.26724 | -111.54 |
| $B_{y_j}$          | 2.0124   | 50.072  | -0.44013 | -9.95   |
| $Z$                |          |         |          |         |
| $W_{y_1}$          | 0.19802  |         |          |         |
| $W_{y_2}$          | -0.09134 |         |          |         |
| $W_{y_3}$          | -2.3525  |         |          |         |
| $W_{y_4}$          | 0.10819  |         |          |         |
| $B_z$              | -1.1367  |         |          |         |
